# Supplementary material for: A simple computer vision pipeline reveals the effects of isolation on social interaction dynamics in Drosophila
Source: PubMed Central journal article supplement (PMC6135522; doi:10.1371/journal.pcbi.1006410), 2018-08-30
Supplement: pcbi.1006410.s015.pdf [file pcbi.1006410.s015.pdf]

Supplementary Table 1 Social isolation induced differentially alternative splicing events.

| <b>DAYS OF ISOLATION</b> | <b>GENE</b> | <b>EVENT TYPE</b> | <b>PATH1</b> | <b>PATH2</b>          |
|--------------------------|-------------|-------------------|--------------|-----------------------|
| <b>1</b>                 | Mf          | A5SS, decrease    | E6,E8        | E6,E7,E8              |
| <b>2</b>                 | Mf          | A5SS, decrease    | E6,E8        | E6,E7,E8              |
|                          | Pif1A,Pif1B | AFE, increase     | E13,E14      | E6,E9,E10,E11,E12,E14 |
| <b>3</b>                 | CG16758     | AFE, increase     | E1,E5        | E2,E3,E5              |
|                          | sqd         | ES, increase      | E3,E5        | E3,E4,E5              |
| <b>6</b>                 | desat1      | MC, decrease      | E1,E6;E2,E6  | E5,E6;E5,E6           |

Note. PATH1&2 A path includes the alternative exons and the flanking exons from one of the two isoforms of the event. The two paths of an event describe the two alternatively used isoforms of the splicing event. Event Types: A5SS: Alternative 5' splicing sites; AFE: Alternative first exons; ES: Exon skipping, MC: Multi-comparison, there are more than 2 paths in comparison.
