# Supplementary material for: A simple computer vision pipeline reveals the effects of isolation on social interaction dynamics in Drosophila
Source: PubMed Central journal article supplement (PMC6135522; doi:10.1371/journal.pcbi.1006410), 2018-08-30
Supplement: pcbi.1006410.s016.pdf [file pcbi.1006410.s016.pdf]

Supplementary Table 2 Individual and local social network parameters of sample network

| <b>Fly</b> | <b>In Degree</b> | <b>Out Degree</b> | <b>Degree</b> | <b>Weighted In Degree</b> | <b>Weighted Out Degree</b> | <b>Weighted Degree</b> | <b>Clustering Coefficient</b> | <b>Betweenness Centrality</b> |
|------------|------------------|-------------------|---------------|---------------------------|----------------------------|------------------------|-------------------------------|-------------------------------|
| <b>1</b>   | 3                | 5                 | 8             | 1                         | 3.2                        | 4.2                    | 0.1804                        | 3                             |
| <b>2</b>   | 2                | 3                 | 5             | 0.6                       | 1.4                        | 2.0                    | 0.2228                        | 1                             |
| <b>3</b>   | 3                | 3                 | 6             | 1.4                       | 0.6                        | 2.0                    | 0.1738                        | 6.5                           |
| <b>4</b>   | 3                | 2                 | 5             | 1.2                       | 0.4                        | 1.6                    | 0.2148                        | 6.0                           |
| <b>5</b>   | 3                | 3                 | 6             | 0.8                       | 1.6                        | 2.4                    | 0.1555                        | 5.5                           |
| <b>6</b>   | 3                | 1                 | 4             | 2.4                       | 0.2                        | 2.6                    | 0.3131                        | 0                             |
