# Supplementary material for: A simple computer vision pipeline reveals the effects of isolation on social interaction dynamics in Drosophila
Source: PubMed Central journal article supplement (PMC6135522; doi:10.1371/journal.pcbi.1006410), 2018-08-30
Supplement: pcbi.1006410.s017.pdf [file pcbi.1006410.s017.pdf]

Supplementary Table 3 Global parameters of sample network

| Global Parameters | Assortativity | Global Efficiency | Density | Transitivity | Weighted Total Interaction |
|-------------------|---------------|-------------------|---------|--------------|----------------------------|
| Values            | 0.1011        | 0.3240            | 0.5667  | 0.1932       | 7.4                        |
